# Supplementary material for: Ultrasonic-assisted fabrication of F-MOFs: morphology and types of pillar-dependent sensing performance to phenolic NAC detection
Source: Royal Society of Chemistry journal article supplement (doi:10.1039/d1nj03817f), 2021-01-01
Supplement: d1nj03817f1.pdf [file d1nj03817f1.pdf]

## Supporting Information

### Ultrasonic-assisted Fabrication of F-MOFs: Morphology and Types of Pillars-Dependent Sensing Performance to Phenolic NACs Detection

**Table S1.** Experimental details for synthesis of TMU-44 and TMU-45 by sonochemical method.

| <b>Compound</b>      | <b>Concentration [ppda]/<br/>[4-bpdh]/[Co(OAc)<sub>2</sub>]<br/>(M)</b> | <b>Time<br/>(min)</b> | <b>Power<br/>(W)</b> | <b>Morphology</b> |
|----------------------|-------------------------------------------------------------------------|-----------------------|----------------------|-------------------|
| <b>TMU-44</b>        | [0.005]/[0.005]/[0.005]                                                 | 15                    | 12                   | Spindle shapes    |
|                      | [0.005]/[0.005]/[0.005]                                                 | 60                    | 12                   | Spindle shapes    |
|                      | [0.01]/[0.01]/[0.01]                                                    | 15                    | 12                   | Spindle shapes    |
|                      | [0.01]/[0.01]/[0.01]                                                    | 60                    | 12                   | Spindle shapes    |
|                      | [0.05]/[0.05]/[0.05]                                                    | 15                    | 12                   | Spindle shapes    |
|                      | [0.05]/[0.05]/[0.05]                                                    | 60                    | 12                   | Spindle shapes    |
| <b>TMU-45</b>        |                                                                         |                       | 12                   |                   |
|                      | [0.005]/[0.005]/[0.005]                                                 | 15                    | 12                   | Spherical shape   |
|                      | [0.005]/[0.005]/[0.005]                                                 | 60                    | 12                   | Spherical shape   |
|                      | [0.01]/[0.01]/[0.01]                                                    | 15                    | 12                   | Spherical shape   |
|                      | [0.01]/[0.01]/[0.01]                                                    | 60                    | 12                   | Spherical shape   |
|                      | [0.05]/[0.05]/[0.05]                                                    | 15                    | 12                   | Spherical shape   |
| [0.05]/[0.05]/[0.05] | 60                                                                      | 12                    | Spherical shape      |                   |

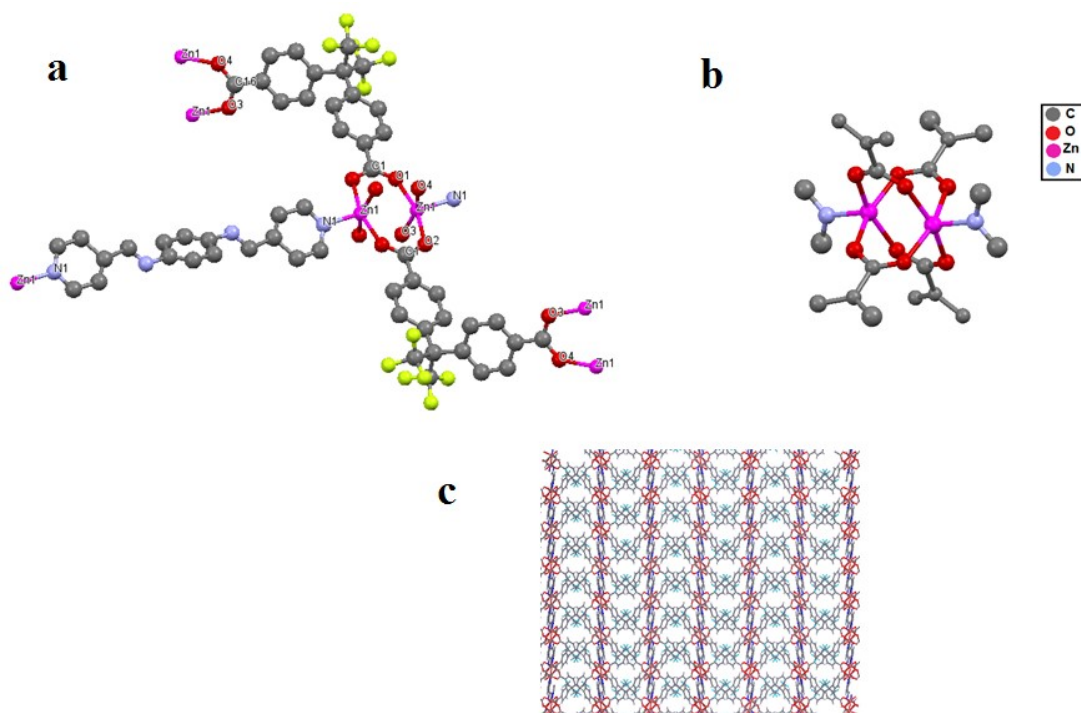

**Fig S1.** (a) Ortep view of the asymmetric unit of TMU-44 showing coordination environment about Zn1. Hydrogen atoms are omitted for clarity, (b) The coordination environment of Zn in TMU-44, and 2D helical Zn(II) hfipbb<sup>2-</sup> sheet (c).

**Table S2.** Crystal data and structural refinement for TMU-44.

| Formula                                       | C <sub>26</sub> H <sub>14</sub> F <sub>6</sub> N <sub>2</sub> O <sub>4</sub> Zn |
|-----------------------------------------------|---------------------------------------------------------------------------------|
| fw                                            | 597.76                                                                          |
| $\lambda/\text{\AA}$                          | 0.71073                                                                         |
| $T/\text{K}$                                  | 100 (2)                                                                         |
| crystal system                                | monoclinic                                                                      |
| space group                                   | <i>P2/c</i>                                                                     |
| $a/\text{\AA}$                                | 15.785(3)                                                                       |
| $b/\text{\AA}$                                | 7.8990(16)                                                                      |
| $c/\text{\AA}$                                | 22.854(5)                                                                       |
| $\alpha/^\circ$                               | 90                                                                              |
| $\beta/^\circ$                                | 100.66(3)                                                                       |
| $\gamma/^\circ$                               | 90                                                                              |
| $V/\text{\AA}^3$                              | 2800.4(10)                                                                      |
| $D_{\text{calc}}/\text{Mg}\cdot\text{m}^{-3}$ | 1.418                                                                           |
| $Z$                                           | 4                                                                               |
| $\mu$ (mm <sup>-1</sup> )                     | 0.949                                                                           |
| $F(000)$                                      | 1200                                                                            |
| $R$ (int)                                     | 0.1504                                                                          |
| GOOF                                          | 1.923                                                                           |
| $R_1^a(I > 2\sigma(I))$                       | 0.2496                                                                          |
| $wR_2^b(I > 2\sigma(I))$                      | 0.5419                                                                          |
| CCDC No.                                      | 1840885                                                                         |

**Table S3.** Selected bond lengths (Å) and angles (°) for TMU-44.

|         |           |           |          |           |           |
|---------|-----------|-----------|----------|-----------|-----------|
| Zn1-Zn1 | 2.957(3)  | O4-Zn1-N1 | 97.1(5)  | O4-Zn1-O3 | 159.8(5)  |
| Zn1-O1  | 2.024(12) | O4-Zn1-O2 | 89.1(5)  | N1-Zn1-O3 | 103.0(5)  |
| Zn1-O2  | 2.014(11) | N1-Zn1-O2 | 103.6(5) | O2-Zn1-O3 | 88.4(5)   |
| Zn1-O3  | 2.043(11) | O4-Zn1-O1 | 88.1(5)  | O1-Zn1-O3 | 87.3(5)   |
| Zn1-O4  | 2.003(13) | N1-Zn1-O1 | 96.5(5)  | C1-O2-Zn1 | 118.0(11) |
| Zn1-N1  | 2.003(11) | O2-Zn1-O1 | 159.9(5) | C1-O1-Zn1 | 135.4(11) |

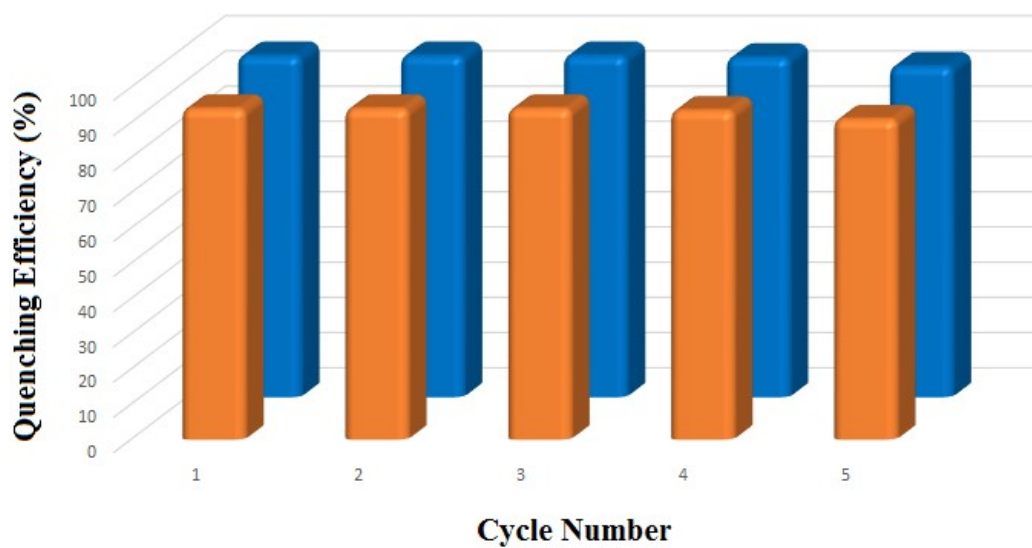

**Figure S2.** Comparison graph of reusability of the TMU-44 and TMU-45 synthesized by ultrasonic as sensors after 5 cycles.
